# Supplementary material for: ‘Gut health’ and the microbiome in the popular press: a content analysis
Source: HighWire-hosted journal article supplement (doi:10.1136/bmjopen-2021-052446), 2021-07-01
Supplement: bmjopen-2021-052446supp001_data_supplement.pdf [file bmjopen-2021-052446supp001_data_supplement.pdf]

## Supplementary Materials

## FACTIVA search summary

| Search Summary |                                                                                                                                                                                                                                                                                                                                                                                                                                                                                                                                                                                                                                                                                                                                                                                                                                                                                                                                                                                                                                                                                                                                                                                                                                                                                                                                                                                                                                                                                                                                                                                                                                                                                                                                                                                                                                                                                                                                                                                                                                                                                                                                                                                                                                                                                                                                                                                                                                                                                                                                                                                                                                                                                                                                                                                                                                                                                                                                                                                                                                                                                                               |
|----------------|---------------------------------------------------------------------------------------------------------------------------------------------------------------------------------------------------------------------------------------------------------------------------------------------------------------------------------------------------------------------------------------------------------------------------------------------------------------------------------------------------------------------------------------------------------------------------------------------------------------------------------------------------------------------------------------------------------------------------------------------------------------------------------------------------------------------------------------------------------------------------------------------------------------------------------------------------------------------------------------------------------------------------------------------------------------------------------------------------------------------------------------------------------------------------------------------------------------------------------------------------------------------------------------------------------------------------------------------------------------------------------------------------------------------------------------------------------------------------------------------------------------------------------------------------------------------------------------------------------------------------------------------------------------------------------------------------------------------------------------------------------------------------------------------------------------------------------------------------------------------------------------------------------------------------------------------------------------------------------------------------------------------------------------------------------------------------------------------------------------------------------------------------------------------------------------------------------------------------------------------------------------------------------------------------------------------------------------------------------------------------------------------------------------------------------------------------------------------------------------------------------------------------------------------------------------------------------------------------------------------------------------------------------------------------------------------------------------------------------------------------------------------------------------------------------------------------------------------------------------------------------------------------------------------------------------------------------------------------------------------------------------------------------------------------------------------------------------------------------------|
| Text           | "gut health" or "healthy gut" or "unhealthy gut" or "gut bacteria" or "microbiota" or "microbiome" or "probiotic" or "probiotics"                                                                                                                                                                                                                                                                                                                                                                                                                                                                                                                                                                                                                                                                                                                                                                                                                                                                                                                                                                                                                                                                                                                                                                                                                                                                                                                                                                                                                                                                                                                                                                                                                                                                                                                                                                                                                                                                                                                                                                                                                                                                                                                                                                                                                                                                                                                                                                                                                                                                                                                                                                                                                                                                                                                                                                                                                                                                                                                                                                             |
| Date           | 01/01/2019 to 10/11/2019                                                                                                                                                                                                                                                                                                                                                                                                                                                                                                                                                                                                                                                                                                                                                                                                                                                                                                                                                                                                                                                                                                                                                                                                                                                                                                                                                                                                                                                                                                                                                                                                                                                                                                                                                                                                                                                                                                                                                                                                                                                                                                                                                                                                                                                                                                                                                                                                                                                                                                                                                                                                                                                                                                                                                                                                                                                                                                                                                                                                                                                                                      |
| Source         | USA Today - All sources Or Los Angeles Times - All sources Or The New York Times - All sources Or Houston Chronicle - All sources Or Chicago Tribune - All sources Or Tampa Bay Times (Fla.) Or Washington Post - All sources Or Newsday (N.Y.) Or New York Post - All sources Or The Dallas Morning News Or The Dallas Morning News Or New York Daily News Or Denver Post - All sources Or The Boston Globe - All sources Or The Seattle Times - All sources Or AM New York Or Star-Tribune (Minneapolis-St. Paul) Or Star-Tribune (Minneapolis-St. Paul) Or The Guardian (U.K.) Or The Telegraph (U.K.) - All sources Or Mirror.co.uk (U.K.) Or Independent Online (U.K.) Or Detroit Free Press - All sources Or The Washington Times Or The Washington Times Or The Oregonian - All sources Or The Times-Picayune Web Edition (New Orleans) Or Orlando Sentinel - All sources Or The Las Vegas Review-Journal Or The Las Vegas Review-Journal Or The Atlanta Journal - Constitution Or Honolulu Star-Advertiser Or Honolulu Star-Advertiser Or The Fort Worth Star-Telegram (Texas) Or Columbus Dispatch - All sources Or The Philadelphia Inquirer Or Worcester Telegram & Gazette (Mass.) Or The Denver Post (Colo.) Or The Buffalo News - All sources Or The San Francisco Chronicle - All sources Or St. Paul Pioneer Press (Minn.) Or The Plain Dealer (Cleveland) Or San Diego Union-Tribune Or The Orange County Register (Calif.) Or The Star Ledger (Newark, N.J.) Or The Arizona Republic (Phoenix) Or Metro - New York Or MSNBC Network - All sources Or ESPN Or CNN - All sources Or Fox News - All sources Or BBC - All sources Or HuffPost Or HuffPost Canada Or BuzzFeed Or Forbes.com Or NBC Network - All sources Or NPR - All Things Considered Or NPR - Morning Edition Or NPR - News Special Or NPR - Weekend All Things Considered Or NPR - Weekend Edition - Saturday Or NPR - Weekend Edition - Sunday Or CBS Network - All sources Or Breitbart News Network Or The Hill (U.S.) Or ABC Network - All sources Or Politico Or Gizmodo Or MarketWatch Or The Daily Beast Or Seeking Alpha Or The Verge Or The Globe and Mail - All sources Or National Post (Canada) Or The Toronto Sun Or The Toronto Star Or Montreal Gazette Or Vancouver Province (British Columbia) Or Vancouver Sun (British Columbia) Or Ottawa Citizen Or The Ottawa Sun (Ontario) Or Calgary Herald (Alberta) Or The Calgary Sun (Alberta) Or Edmonton Journal (Alberta) Or The Edmonton Sun (Alberta) Or Winnipeg Free Press (Manitoba) Or The Winnipeg Sun (Manitoba) Or The Hamilton Spectator (Ontario) Or The London Free Press (Ontario) Or Waterloo Region Record (Ontario) Or Chronicle Herald (Nova Scotia) Or Niagara Falls Review (Ontario) Or Victoria Times Colonist (Vancouver, British Columbia) Or Windsor Star (Ontario) Or Saskatoon Star Phoenix (Saskatchewan) Or Regina Leader Post (Saskatchewan) Or The Telegram (Newfoundland) Or Daily Mail (U.K.) Or The Wall Street Journal Or The Wall Street Journal Online Or Business Insider (U.S.) Or Reuters News Or Reuters Health E-Line |
| Author         | All Authors                                                                                                                                                                                                                                                                                                                                                                                                                                                                                                                                                                                                                                                                                                                                                                                                                                                                                                                                                                                                                                                                                                                                                                                                                                                                                                                                                                                                                                                                                                                                                                                                                                                                                                                                                                                                                                                                                                                                                                                                                                                                                                                                                                                                                                                                                                                                                                                                                                                                                                                                                                                                                                                                                                                                                                                                                                                                                                                                                                                                                                                                                                   |
| Company        | All Companies                                                                                                                                                                                                                                                                                                                                                                                                                                                                                                                                                                                                                                                                                                                                                                                                                                                                                                                                                                                                                                                                                                                                                                                                                                                                                                                                                                                                                                                                                                                                                                                                                                                                                                                                                                                                                                                                                                                                                                                                                                                                                                                                                                                                                                                                                                                                                                                                                                                                                                                                                                                                                                                                                                                                                                                                                                                                                                                                                                                                                                                                                                 |
| Subject        | All Subjects                                                                                                                                                                                                                                                                                                                                                                                                                                                                                                                                                                                                                                                                                                                                                                                                                                                                                                                                                                                                                                                                                                                                                                                                                                                                                                                                                                                                                                                                                                                                                                                                                                                                                                                                                                                                                                                                                                                                                                                                                                                                                                                                                                                                                                                                                                                                                                                                                                                                                                                                                                                                                                                                                                                                                                                                                                                                                                                                                                                                                                                                                                  |
| Industry       | All Industries                                                                                                                                                                                                                                                                                                                                                                                                                                                                                                                                                                                                                                                                                                                                                                                                                                                                                                                                                                                                                                                                                                                                                                                                                                                                                                                                                                                                                                                                                                                                                                                                                                                                                                                                                                                                                                                                                                                                                                                                                                                                                                                                                                                                                                                                                                                                                                                                                                                                                                                                                                                                                                                                                                                                                                                                                                                                                                                                                                                                                                                                                                |
| Region         | All Regions                                                                                                                                                                                                                                                                                                                                                                                                                                                                                                                                                                                                                                                                                                                                                                                                                                                                                                                                                                                                                                                                                                                                                                                                                                                                                                                                                                                                                                                                                                                                                                                                                                                                                                                                                                                                                                                                                                                                                                                                                                                                                                                                                                                                                                                                                                                                                                                                                                                                                                                                                                                                                                                                                                                                                                                                                                                                                                                                                                                                                                                                                                   |
| Language       | English                                                                                                                                                                                                                                                                                                                                                                                                                                                                                                                                                                                                                                                                                                                                                                                                                                                                                                                                                                                                                                                                                                                                                                                                                                                                                                                                                                                                                                                                                                                                                                                                                                                                                                                                                                                                                                                                                                                                                                                                                                                                                                                                                                                                                                                                                                                                                                                                                                                                                                                                                                                                                                                                                                                                                                                                                                                                                                                                                                                                                                                                                                       |
| Results Found  | 2,676                                                                                                                                                                                                                                                                                                                                                                                                                                                                                                                                                                                                                                                                                                                                                                                                                                                                                                                                                                                                                                                                                                                                                                                                                                                                                                                                                                                                                                                                                                                                                                                                                                                                                                                                                                                                                                                                                                                                                                                                                                                                                                                                                                                                                                                                                                                                                                                                                                                                                                                                                                                                                                                                                                                                                                                                                                                                                                                                                                                                                                                                                                         |
| Timestamp      | 11 October 2019 10:47 AM                                                                                                                                                                                                                                                                                                                                                                                                                                                                                                                                                                                                                                                                                                                                                                                                                                                                                                                                                                                                                                                                                                                                                                                                                                                                                                                                                                                                                                                                                                                                                                                                                                                                                                                                                                                                                                                                                                                                                                                                                                                                                                                                                                                                                                                                                                                                                                                                                                                                                                                                                                                                                                                                                                                                                                                                                                                                                                                                                                                                                                                                                      |

© 2019 Factiva, Inc. All rights reserved

## Sources and count table

|                         |     |     |
|-------------------------|-----|-----|
| Calgary Herald          | CAN | 12  |
| Edmonton Journal        | CAN | 2   |
| Montreal Gazette        | CAN | 13  |
| National Post           | CAN | 2   |
| Regina Leader Post      | CAN | 1   |
| Saskatoon Star Phoenix  | CAN | 1   |
| The Globe and Mail      | CAN | 27  |
| The Hamilton Spectator  | CAN | 30  |
| The London Free Press   | CAN | 2   |
| The Ottawa Sun          | CAN | 2   |
| The Toronto Star        | CAN | 11  |
| The Toronto Sun         | CAN | 3   |
| The Winnipeg Sun        | CAN | 1   |
| Vancouver Province      | CAN | 5   |
| Vancouver Sun           | CAN | 6   |
| Victoria Times Colonist | CAN | 15  |
| Waterloo Region Record  | CAN | 4   |
| Winnipeg Free Press     | CAN | 6   |
| Daily Mail              | UK  | 82  |
| Independent Online      | UK  | 53  |
| Mirror.co.uk            | UK  | 68  |
| Telegraph               | UK  | 170 |
| The Guardian            | UK  | 70  |
| Business Insider        | USA | 16  |
| CBS News: Evening News  | USA | 1   |
| CNN Wire                | USA | 20  |
| Forbes.com              | USA | 7   |
| MarketWatch             | USA | 4   |
| New York Daily News     | USA | 1   |
| New York Post           | USA | 19  |

|                                    |     |     |        |
|------------------------------------|-----|-----|--------|
| New York Times                     | USA | 21  |        |
| Reuters News                       | USA | 23  |        |
| Star-Tribune                       | USA | 13  |        |
| Tampa Bay Times                    | USA | 7   |        |
| The Atlanta Journal - Constitution | USA | 4   |        |
| The Boston Globe                   | USA | 17  |        |
| The New York Times                 | USA | 30  |        |
| The Philadelphia Inquirer          | USA | 10  |        |
| The Wall Street Journal            | USA | 13  |        |
| The Washington Post                | USA | 33  |        |
| USA Today                          | USA | 5   |        |
| *                                  |     |     |        |
|                                    |     |     |        |
|                                    | USA | 18  |        |
|                                    | CAN | 18  |        |
|                                    | UK  | 5   |        |
|                                    |     |     | 41     |
| TOTALS                             | CAN | 143 | 17.2%  |
|                                    | USA | 244 | 29.4%  |
|                                    | UK  | 443 | 53.4%  |
|                                    |     |     |        |
|                                    |     |     |        |
|                                    |     | 830 | 100.0% |

\*with a large number of articles coming from one source (*The Telegraph*), analysis was conducted to conclude that the singular source was not displaying a trend of findings different from that of the remaining sources

Gut Health/Microbiome Coding Frame      October 2019 / HLI, University of Alberta

#### Overview coding for context

1. Choose1: Is the article Relevant or Irrelevant? (Irrelevant articles include: one of the search terms appearing in text with no supporting text or elaboration; transcripts of radio or tv shows; one of the search terms used solely in the context of animal health; duplicate of previously read article)
2. Is the article's main focus highlighting research? Yes/No
3. Does the article include a discussion of babies/children in relation to gut health (including all search terms included)?

#### Principle content coding

1. Does the article make claims of health benefits related to gut health (gut bacteria), probiotics, or the microbiome (microbiota)? Yes/No
  - 1b. If yes in #1, what health benefits are listed? [choose all that apply – always code a specific benefit if possible before coding for a more general category]

- Brain health (memory, learning, cognitive abilities, etc.)
- General health (no specific items listed but seen as valuable for health, and also, general phrasing such as “optimal gut health”; “optimal health”; “improve wellness”; “manage stress”, “good wellbeing, etc.)
- General mental health (“mental health”, but no specifics mentioned, etc.)
- General Digestive/GI Issues (bloating, gas (flatulence), diarrhea, acid reflux, leaky gut also “aiding”, “helping with”, etc.)
- Skin health (including cosmetic and more serious issues like eczema, psoriasis or other forms of dermatitis)
- Allergies
- Alzheimer’s disease
- Anorexia
- Anxiety
- Arthritis
- Behaviour (children)
- Cancer
- Clostridium difficile (C. diff)
- Colds (“common colds”, etc.)
- Colic
- Crohn’s disease/Colitis/Irritable Bowel Disease
- Dementia
- Depression
- Diabetes
- Energy related (including fatigue, and Chronic Fatigue Syndrome (CFS))
- Fibromyalgia
- Headaches
- Heart related (including heart disease and artery issues)
- Immune system related (“boosting”, improving, fighting off infection, etc.)
- Irritable Bowel Syndrome (IBS)
- Menopause (including hormonal imbalances)
- Mood (improving)
- Multiple Sclerosis
- Obesity (including weight management (weight loss, etc.)
- Oral disease
- Parkinson’s disease
- Pain (including chronic pain, joint pain)
- Pharmaceutical drug development
- Pharmaceutical drug metabolizing
- Pregnancy health (including avoiding premature delivery)
- Other [fill in]

2. Does the article provide information (actions one can take) regarding how an individual can reap benefits related to gut health (gut bacteria), probiotics, or the microbiome (microbiota)? Yes/No

2b) If yes in #2, what actions are mentioned? [list] (e.g. eating certain foods, fecal transplants, etc.)?  
[choose all that apply]

- Food/drink intake (including fostering diversity, and eating schedule/advice related to food timing, chewing, etc.)
  - Avoiding certain food/drinks
  - Breastfeeding
  - Take probiotics
  - Take prebiotics
  - General actions (“monitor”, “look after”; “take care of”, etc.)
  - Avoid antibiotics
  - Avoid caesareans (including be wary of; benefits lost if, etc.)
  - Avoid over-sanitation of house (including avoiding chemicals in cleaning products)
  - Avoid smoking (including stop smoking)
  - Exercise
  - Fecal transplant (including pills (i.e. “poop pills”))
  - Massage
  - Sinus microbiome transplant
  - Sleep related (get more, get better, etc.)
  - Weight management (“control”, etc.)
  - Yoga
  - Vaginal seeding
  - Other [fill in]
3. Does the article state, in any form, that the benefits or current research related to gut health (gut bacteria), probiotics, or the microbiome (microbiota) might be unproven, ineffective or exaggerated? Yes/No
- 3a) If yes, is this rhetoric described as “(only) preliminary research”, “developing research”, “early stage research”, etc.
4. (ADDITION TO #1, attached to coding platform) Does the article portray probiotics as beneficial without making links to ideas of the microbiome/gut health? Yes/No

#### Complete list of Health Topics

|   | Health topics               | # of articles | (n=732) | n=830 | 1502   |
|---|-----------------------------|---------------|---------|-------|--------|
| 1 | General health              | 284           | 38.8%   | 34.2% | 18.91% |
| 2 | General Digestive/GI Issues | 126           | 17.2%   | 15.2% | 8.39%  |
| 3 | Immune system related       | 105           | 14.3%   | 12.7% | 6.99%  |
| 4 | Obesity                     | 84            | 11.5%   | 10.1% | 5.59%  |
| 5 | Cancer                      | 51            | 7.0%    | 6.1%  | 3.40%  |
| 6 | General mental health       | 51            | 7.0%    | 6.1%  | 3.40%  |
| 7 | Allergies                   | 50            | 6.8%    | 6.0%  | 3.33%  |
| 8 | Skin Health                 | 46            | 6.3%    | 5.5%  | 3.06%  |
| 9 | Diabetes                    | 43            | 5.9%    | 5.2%  | 2.86%  |

|    |                                                |    |      |      |       |
|----|------------------------------------------------|----|------|------|-------|
| 10 | Depression                                     | 42 | 5.7% | 5.1% | 2.80% |
| 11 | Asthma                                         | 36 | 4.9% | 4.3% | 2.40% |
| 12 | Crohns disease/Colitis/Irritable Bowel Disease | 33 | 4.5% | 4.0% | 2.20% |
| 13 | Mood                                           | 32 | 4.4% | 3.9% | 2.13% |
| 14 | Brain health                                   | 30 | 4.1% | 3.6% | 2.00% |
| 15 | Irritable Bowel Syndrome                       | 30 | 4.1% | 3.6% | 2.00% |
| 16 | Clostridium difficile                          | 29 | 4.0% | 3.5% | 1.93% |
| 17 | Inflammation                                   | 26 | 3.6% | 3.1% | 1.73% |
| 18 | Anxiety                                        | 24 | 3.3% | 2.9% | 1.60% |
| 19 | Inflammatory Bowel Disease                     | 21 | 2.9% | 2.5% | 1.40% |
| 20 | Heart related                                  | 18 | 2.5% | 2.2% | 1.20% |
| 21 | Alzheimers disease                             | 15 | 2.0% | 1.8% | 1.00% |
| 22 | Energy related                                 | 14 | 1.9% | 1.7% | 0.93% |
| 23 | Parkinsons disease                             | 14 | 1.9% | 1.7% | 0.93% |
| 24 | Autism                                         | 12 | 1.6% | 1.4% | 0.80% |
| 25 | Metabolism                                     | 11 | 1.5% | 1.3% | 0.73% |
| 26 | Metabolic Disorder                             | 10 | 1.4% | 1.2% | 0.67% |
| 27 | Autoimmune Diseases (disorders)                | 9  | 1.2% | 1.1% | 0.60% |
| 28 | Diarrhea                                       | 9  | 1.2% | 1.1% | 0.60% |
| 29 | Intestinal Permeability (leaky gut)            | 9  | 1.2% | 1.1% | 0.60% |
| 30 | Sleep                                          | 9  | 1.2% | 1.1% | 0.60% |
| 31 | Weight management                              | 9  | 1.2% | 1.1% | 0.60% |
| 32 | Dementia                                       | 8  | 1.1% | 1.0% | 0.53% |
| 33 | Menopause                                      | 8  | 1.1% | 1.0% | 0.53% |
| 34 | Multiple Sclerosis                             | 7  | 1.0% | 0.8% | 0.47% |
| 35 | Stress                                         | 7  | 1.0% | 0.8% | 0.47% |
| 36 | Athletic Performance/Recovery                  | 6  | 0.8% | 0.7% | 0.40% |
| 37 | Liver Disease                                  | 6  | 0.8% | 0.7% | 0.40% |
| 38 | Vitamin Absorption                             | 6  | 0.8% | 0.7% | 0.40% |
| 39 | Antibiotic resistance (and recovery)           | 5  | 0.7% | 0.6% | 0.33% |
| 40 | Arthritis                                      | 5  | 0.7% | 0.6% | 0.33% |
| 41 | Metabolic Syndrome                             | 5  | 0.7% | 0.6% | 0.33% |
| 42 | Constipation                                   | 4  | 0.5% | 0.5% | 0.27% |
| 43 | Diverticulitis                                 | 4  | 0.5% | 0.5% | 0.27% |
| 44 | Eczema in Children                             | 4  | 0.5% | 0.5% | 0.27% |
| 45 | ADHD                                           | 3  | 0.4% | 0.4% | 0.20% |

|    |                                 |   |      |      |       |
|----|---------------------------------|---|------|------|-------|
| 46 | Appetite                        | 3 | 0.4% | 0.4% | 0.20% |
| 47 | Bipolar Disorder                | 3 | 0.4% | 0.4% | 0.20% |
| 48 | cardiovascular disease          | 3 | 0.4% | 0.4% | 0.20% |
| 49 | Colds                           | 3 | 0.4% | 0.4% | 0.20% |
| 50 | Headaches                       | 3 | 0.4% | 0.4% | 0.20% |
| 51 | Influenza                       | 3 | 0.4% | 0.4% | 0.20% |
| 52 | Lyme Disease                    | 3 | 0.4% | 0.4% | 0.20% |
| 53 | Oral Hygiene                    | 3 | 0.4% | 0.4% | 0.20% |
| 54 | PKU                             | 3 | 0.4% | 0.4% | 0.20% |
| 55 | Pregnancy health                | 3 | 0.4% | 0.4% | 0.20% |
| 56 | Preventative measures (disease) | 3 | 0.4% | 0.4% | 0.20% |
| 57 | Tooth decay                     | 3 | 0.4% | 0.4% | 0.20% |
| 58 | Vaginal issues                  | 3 | 0.4% | 0.4% | 0.20% |
| 59 | Aging                           | 2 | 0.3% | 0.2% | 0.13% |
| 60 | Behaviour                       | 2 | 0.3% | 0.2% | 0.13% |
| 61 | Blood circulation               | 2 | 0.3% | 0.2% | 0.13% |
| 62 | Bone Health (density)           | 2 | 0.3% | 0.2% | 0.13% |
| 63 | Cholesterol                     | 2 | 0.3% | 0.2% | 0.13% |
| 64 | Eating disorders                | 2 | 0.3% | 0.2% | 0.13% |
| 65 | E-coli                          | 2 | 0.3% | 0.2% | 0.13% |
| 66 | Fibromyalgia                    | 2 | 0.3% | 0.2% | 0.13% |
| 67 | Gene Activity                   | 2 | 0.3% | 0.2% | 0.13% |
| 68 | General Beauty and Apperance    | 2 | 0.3% | 0.2% | 0.13% |
| 69 | HIV                             | 2 | 0.3% | 0.2% | 0.13% |
| 70 | Immunity                        | 2 | 0.3% | 0.2% | 0.13% |
| 71 | Infections (general)            | 2 | 0.3% | 0.2% | 0.13% |
| 72 | Jet lag                         | 2 | 0.3% | 0.2% | 0.13% |
| 73 | Migraine                        | 2 | 0.3% | 0.2% | 0.13% |
| 74 | Motor Nueron Disease            | 2 | 0.3% | 0.2% | 0.13% |
| 75 | Oral disease                    | 2 | 0.3% | 0.2% | 0.13% |
| 76 | Pain                            | 2 | 0.3% | 0.2% | 0.13% |
| 77 | Seratonin Levels                | 2 | 0.3% | 0.2% | 0.13% |
| 78 | ulcers                          | 2 | 0.3% | 0.2% | 0.13% |
| 79 | Urea Cycle Disorders            | 2 | 0.3% | 0.2% | 0.13% |
| 80 | Urinary Tract Infections        | 2 | 0.3% | 0.2% | 0.13% |
| 81 | Polycystic Ovary Syndrome       | 2 | 0.3% | 0.2% | 0.13% |

|     |                           |   |      |      |       |
|-----|---------------------------|---|------|------|-------|
| 82  | Alcohol Cravings          | 1 | 0.1% | 0.1% | 0.07% |
| 83  | Anemia                    | 1 | 0.1% | 0.1% | 0.07% |
| 84  | Antioxidant Status        | 1 | 0.1% | 0.1% | 0.07% |
| 85  | Appendicitis              | 1 | 0.1% | 0.1% | 0.07% |
| 86  | Appetite                  | 1 | 0.1% | 0.1% | 0.07% |
| 87  | artery health             | 1 | 0.1% | 0.1% | 0.07% |
| 88  | bloodstream infections    | 1 | 0.1% | 0.1% | 0.07% |
| 89  | Celiac Disease            | 1 | 0.1% | 0.1% | 0.07% |
| 90  | Chemotherapy Recovery     | 1 | 0.1% | 0.1% | 0.07% |
| 91  | Childhood Development     | 1 | 0.1% | 0.1% | 0.07% |
| 92  | Cholera                   | 1 | 0.1% | 0.1% | 0.07% |
| 93  | Cognitive Disorder        | 1 | 0.1% | 0.1% | 0.07% |
| 94  | Dental Health/Gingivitis  | 1 | 0.1% | 0.1% | 0.07% |
| 95  | Emotional Responses       | 1 | 0.1% | 0.1% | 0.07% |
| 96  | Flu vaccine effectiveness | 1 | 0.1% | 0.1% | 0.07% |
| 97  | Gluten Intolerances       | 1 | 0.1% | 0.1% | 0.07% |
| 98  | Glycemic Control          | 1 | 0.1% | 0.1% | 0.07% |
| 99  | Gonorrhoea                | 1 | 0.1% | 0.1% | 0.07% |
| 100 | Gum Disease               | 1 | 0.1% | 0.1% | 0.07% |
| 101 | H. Pylori Eradication     | 1 | 0.1% | 0.1% | 0.07% |
| 102 | Hair loss                 | 1 | 0.1% | 0.1% | 0.07% |
| 103 | Hairy tongue              | 1 | 0.1% | 0.1% | 0.07% |
| 104 | Healing system            | 1 | 0.1% | 0.1% | 0.07% |
| 105 | Heartburn                 | 1 | 0.1% | 0.1% | 0.07% |
| 106 | Hepatic Encephalopathy    | 1 | 0.1% | 0.1% | 0.07% |
| 107 | Hormonal Bloating         | 1 | 0.1% | 0.1% | 0.07% |
| 108 | Hyperammonemia            | 1 | 0.1% | 0.1% | 0.07% |
| 109 | Hypertension              | 1 | 0.1% | 0.1% | 0.07% |
| 110 | Improve focus             | 1 | 0.1% | 0.1% | 0.07% |
| 111 | Infant Breastfeeding      | 1 | 0.1% | 0.1% | 0.07% |
| 112 | Infertility               | 1 | 0.1% | 0.1% | 0.07% |
| 113 | Interstitial Cystitis     | 1 | 0.1% | 0.1% | 0.07% |
| 114 | Iron Deficiency           | 1 | 0.1% | 0.1% | 0.07% |
| 115 | Kidney Disease            | 1 | 0.1% | 0.1% | 0.07% |
| 116 | Kidney Stones             | 1 | 0.1% | 0.1% | 0.07% |
| 117 | Medication Rashes         | 1 | 0.1% | 0.1% | 0.07% |

|     |                                  |   |      |      |       |
|-----|----------------------------------|---|------|------|-------|
| 118 | Melanoma                         | 1 | 0.1% | 0.1% | 0.07% |
| 119 | Menstral health                  | 1 | 0.1% | 0.1% | 0.07% |
| 120 | motor neurone disease            | 1 | 0.1% | 0.1% | 0.07% |
| 121 | Mucus Colitis                    | 1 | 0.1% | 0.1% | 0.07% |
| 122 | Nervous system related           | 1 | 0.1% | 0.1% | 0.07% |
| 123 | Osteoarthritis                   | 1 | 0.1% | 0.1% | 0.07% |
| 124 | Osteoporosis                     | 1 | 0.1% | 0.1% | 0.07% |
| 125 | Pharmaceutical drug development  | 1 | 0.1% | 0.1% | 0.07% |
| 126 | Pharmaceutical drug metabolizing | 1 | 0.1% | 0.1% | 0.07% |
| 127 | phenylketonuria                  | 1 | 0.1% | 0.1% | 0.07% |
| 128 | Pneumonia                        | 1 | 0.1% | 0.1% | 0.07% |
| 129 | Pouchitis                        | 1 | 0.1% | 0.1% | 0.07% |
| 130 | Premature Births                 | 1 | 0.1% | 0.1% | 0.07% |
| 131 | psoriasis                        | 1 | 0.1% | 0.1% | 0.07% |
| 132 | rehab                            | 1 | 0.1% | 0.1% | 0.07% |
| 133 | Respiratory infections           | 1 | 0.1% | 0.1% | 0.07% |
| 134 | Schizophrenia                    | 1 | 0.1% | 0.1% | 0.07% |
| 135 | Sore Tongue                      | 1 | 0.1% | 0.1% | 0.07% |
| 136 | Thyroid Condition                | 1 | 0.1% | 0.1% | 0.07% |
| 137 | Transplant Success               | 1 | 0.1% | 0.1% | 0.07% |
| 138 | UTIs                             | 1 | 0.1% | 0.1% | 0.07% |

## Complete list of actions

|    | Health Action                  | # articles | out of 653 articles with actions | 830   | 983   |
|----|--------------------------------|------------|----------------------------------|-------|-------|
| 1  | Food/drink intake              | 373        | 57.1%                            | 44.9% | 37.9% |
| 2  | Take probiotics                | 174        | 26.6%                            | 21.0% | 17.7% |
| 3  | Avoiding certain food/drinks   | 85         | 13.0%                            | 10.2% | 8.6%  |
| 4  | Avoid antibiotics              | 55         | 8.4%                             | 6.6%  | 5.6%  |
| 5  | Fecal transplant               | 37         | 5.7%                             | 4.5%  | 3.8%  |
| 6  | Avoid caesareans               | 21         | 3.2%                             | 2.5%  | 2.1%  |
| 7  | Stress Management              | 21         | 3.2%                             | 2.5%  | 2.1%  |
| 8  | Breastfeeding                  | 19         | 2.9%                             | 2.3%  | 1.9%  |
| 9  | Take prebiotics                | 18         | 2.8%                             | 2.2%  | 1.8%  |
| 10 | Exercise                       | 16         | 2.5%                             | 1.9%  | 1.6%  |
| 11 | Avoid over-sanitation of house | 13         | 2.0%                             | 1.6%  | 1.3%  |
| 12 | General actions                | 13         | 2.0%                             | 1.6%  | 1.3%  |
| 13 | Avoid alcohol                  | 10         | 1.5%                             | 1.2%  | 1.0%  |
| 14 | Supplements                    | 9          | 1.4%                             | 1.1%  | 0.9%  |
| 15 | Fasting                        | 8          | 1.2%                             | 1.0%  | 0.8%  |



|    |                                                                     |   |      |      |      |
|----|---------------------------------------------------------------------|---|------|------|------|
| 16 | Sleep                                                               | 8 | 1.2% | 1.0% | 0.8% |
| 17 | Spending time outdoors (+ dirt play)                                | 7 | 1.1% | 0.8% | 0.7% |
| 18 | Medications                                                         | 5 | 0.8% | 0.6% | 0.5% |
| 19 | Yoga                                                                | 4 | 0.6% | 0.5% | 0.4% |
| 20 | Avoid acid-suppressing drugs                                        | 3 | 0.5% | 0.4% | 0.3% |
| 21 | Colonics                                                            | 3 | 0.5% | 0.4% | 0.3% |
| 22 | Detoxes                                                             | 3 | 0.5% | 0.4% | 0.3% |
| 23 | Avoid Pollution                                                     | 2 | 0.3% | 0.2% | 0.2% |
| 24 | Avoid proton-pump inhibitors                                        | 2 | 0.3% | 0.2% | 0.2% |
| 25 | bacteriophages                                                      | 2 | 0.3% | 0.2% | 0.2% |
| 26 | Medication Research and Development                                 | 2 | 0.3% | 0.2% | 0.2% |
| 27 | Raw water                                                           | 2 | 0.3% | 0.2% | 0.2% |
| 28 | Use Eco-Friendly Household Cleaners                                 | 2 | 0.3% | 0.2% | 0.2% |
| 29 | Mayr Method                                                         | 2 | 0.3% | 0.2% | 0.2% |
| 30 | Personalized diet                                                   | 2 | 0.3% | 0.2% | 0.2% |
| 31 | Vaginal Seeding                                                     | 2 | 0.3% | 0.2% | 0.2% |
| 32 | Monitor poo (and schedule)                                          | 2 | 0.3% | 0.2% | 0.2% |
| 33 | Avoid Stomach Acid Blockers                                         | 2 | 0.3% | 0.2% | 0.2% |
| 34 | Gut Health Clinics                                                  | 2 | 0.3% | 0.2% | 0.2% |
| 35 | Eat breakfast                                                       | 2 | 0.3% | 0.2% | 0.2% |
| 36 | Eat slowly                                                          | 1 | 0.2% | 0.1% | 0.1% |
| 37 | Hydration                                                           | 1 | 0.2% | 0.1% | 0.1% |
| 38 | IV/Drip therapy                                                     | 1 | 0.2% | 0.1% | 0.1% |
| 39 | Vaginal Birth                                                       | 1 | 0.2% | 0.1% | 0.1% |
| 40 | CBD Oil                                                             | 1 | 0.2% | 0.1% | 0.1% |
| 41 | Adult Consumption of Breast Milk                                    | 1 | 0.2% | 0.1% | 0.1% |
| 42 | Pilates                                                             | 1 | 0.2% | 0.1% | 0.1% |
| 43 | Liver Treatments                                                    | 1 | 0.2% | 0.1% | 0.1% |
| 44 | Animal Saliva                                                       | 1 | 0.2% | 0.1% | 0.1% |
| 45 | Anti-microbials                                                     | 1 | 0.2% | 0.1% | 0.1% |
| 46 | Appendix Removal                                                    | 1 | 0.2% | 0.1% | 0.1% |
| 47 | Peppermint Oil                                                      | 1 | 0.2% | 0.1% | 0.1% |
| 48 | Avoid Childhood Vaccination                                         | 1 | 0.2% | 0.1% | 0.1% |
| 49 | Avoid Endocrine Disruptor Exposure                                  | 1 | 0.2% | 0.1% | 0.1% |
| 50 | Avoid Giving Infants Scented Baths                                  | 1 | 0.2% | 0.1% | 0.1% |
| 51 | Avoid glyphosate fertilizers                                        | 1 | 0.2% | 0.1% | 0.1% |
| 52 | Avoid Herbicide Exposure                                            | 1 | 0.2% | 0.1% | 0.1% |
| 53 | Avoid intense scrubbing, shaving, waxing and exposure to sun (skin) | 1 | 0.2% | 0.1% | 0.1% |
| 54 | Avoid Limiting Transmission of Maternal Microbiota                  | 1 | 0.2% | 0.1% | 0.1% |
| 55 | Avoid Mouthwash                                                     | 1 | 0.2% | 0.1% | 0.1% |
| 56 | Avoid NSAID painkillers                                             | 1 | 0.2% | 0.1% | 0.1% |
| 57 | Avoid smoking                                                       | 1 | 0.2% | 0.1% | 0.1% |
| 58 | Avoid taking opioids for long periods of time                       | 1 | 0.2% | 0.1% | 0.1% |
| 59 | Hormones                                                            | 1 | 0.2% | 0.1% | 0.1% |
| 60 | Azithromycin use                                                    | 1 | 0.2% | 0.1% | 0.1% |
| 61 | Bioengineered Bacteria                                              | 1 | 0.2% | 0.1% | 0.1% |
| 62 | City stop spraying glyphosate in city parks                         | 1 | 0.2% | 0.1% | 0.1% |

|    |                                                  |   |      |      |      |
|----|--------------------------------------------------|---|------|------|------|
| 63 | Colon Cancer Screening                           | 1 | 0.2% | 0.1% | 0.1% |
| 64 | Cryotherapy                                      | 1 | 0.2% | 0.1% | 0.1% |
| 65 | Drugs Containing Human Gut Microbes              | 1 | 0.2% | 0.1% | 0.1% |
| 66 | E. Coli Derivative                               | 1 | 0.2% | 0.1% | 0.1% |
| 67 | Electrical Stimulation of the Vagus Nerve        | 1 | 0.2% | 0.1% | 0.1% |
| 68 | Engineered Genes                                 | 1 | 0.2% | 0.1% | 0.1% |
| 69 | Eradicate Gut Health Following Cardiac Arrest    | 1 | 0.2% | 0.1% | 0.1% |
| 70 | Freeze-Dried Healthy Gut Bacteria                | 1 | 0.2% | 0.1% | 0.1% |
| 71 | Skin-to-Skin Contact Between Mother and Baby     | 1 | 0.2% | 0.1% | 0.1% |
| 72 | Gardening                                        | 1 | 0.2% | 0.1% | 0.1% |
| 73 | Gargling and Singing Loudly                      | 1 | 0.2% | 0.1% | 0.1% |
| 74 | Gratitude Journalling,                           | 1 | 0.2% | 0.1% | 0.1% |
| 75 | Hormonal Therapy                                 | 1 | 0.2% | 0.1% | 0.1% |
| 76 | Injecting Antibiotics Rather than Ingesting Them | 1 | 0.2% | 0.1% | 0.1% |
| 77 | Interactions with Other Children                 | 1 | 0.2% | 0.1% | 0.1% |
| 78 | Intestinal Absorbent (Enterogel)                 | 1 | 0.2% | 0.1% | 0.1% |
| 79 | Lower glycemic load                              | 1 | 0.2% | 0.1% | 0.1% |
| 80 | microbiome drug                                  | 1 | 0.2% | 0.1% | 0.1% |
| 81 | migration                                        | 1 | 0.2% | 0.1% | 0.1% |
| 82 | more holistic approach to health                 | 1 | 0.2% | 0.1% | 0.1% |
| 83 | Psychobiotics                                    | 1 | 0.2% | 0.1% | 0.1% |
| 84 | Relationships                                    | 1 | 0.2% | 0.1% | 0.1% |
| 85 | Sinus microbiome transplant                      | 1 | 0.2% | 0.1% | 0.1% |
| 86 | treatments, diagnostic testing                   | 1 | 0.2% | 0.1% | 0.1% |
| 87 | Use of probiotic cleaning                        | 1 | 0.2% | 0.1% | 0.1% |
